# Supplementary material for: Controlled release of siliceous species for the fabrication of highlyb-oriented MFI zeolite films
Source: Royal Society of Chemistry journal article supplement (doi:10.1039/c9ce00817a), 2019-01-01
Supplement: c9ce00817a1.pdf [file c9ce00817a1.pdf]

*Supporting Information*

**Controlled Release of Siliceous Species for the Fabrication of Highly *b*-Oriented MFI Zeolite Films**

Yong Peng,<sup>a\*</sup> Ruilan Xu,<sup>a</sup> Xiaofei Lu,<sup>b</sup> Xinde Jiang<sup>a</sup> and Zhengbao Wang<sup>b\*</sup>

<sup>a</sup> School of Science, Nanchang Institute of Technology, Nanchang 330099, P. R. China.

<sup>b</sup> College of Chemical and Biological Engineering, Zhejiang University, Hangzhou 310027, P. R. China.

**Corresponding author:** pengyong@nit.edu.cn (Y. Peng), zbwang@zju.edu.cn (Z.B. Wang)

**Materials:** Stainless steel plates were immersed in hydrogen peroxide solution for 45 min, then rinsed with deionized water, and dried at 60 °C before the synthesis of zeolite films. Tetraethyl orthosilicate (TEOS, 98%) and 1,2-dihydroxybenzene (99%) were purchased from J&K Scientific Ltd.. Tetrapropylammonium hydroxide (TPAOH, 25wt. %) was supplied by Sachem Wuxi.

**Preparation of MFI zeolite seeds:** The synthesis solution of molar composition 0.17 TPAOH:1 TEOS:165 H<sub>2</sub>O was prepared by slowly adding TEOS to a solution of TPAOH and water under stirring. A clear synthesis solution was obtained after stirring at room temperature for 4 h. Then the synthesis solution was directly loaded into a Teflon-lined stainless steel autoclave. The autoclave was sealed and fixed in the rotation shaft of a convectional oven. It rotated with the axis at 20 rpm in the oven at 175 °C for 130 min. After synthesis, the mixture was quenched. The sample was recovered, thoroughly washed with deionized water, and dried at 60 °C. The size of the MFI zeolite seed crystals is ca. 1 μm.

**Preparation of *b*-oriented MFI zeolite films:** Perfectly *b*-oriented MFI seed monolayers were prepared on film supports by rubbing MFI zeolite crystals with a finger in latex glove and then heat treated at 165 °C for 4 h. The seeded support was vertically placed in a Teflon-lined stainless steel autoclave for secondary growth. The synthesis solution was prepared by slowly adding TEOS to a solution of TPAOH and water under stirring. After the solution was clear, 1,2-dihydroxybenzene was added into the synthesis solution. The molar composition of the resulting solution was 0.2TPAOH : 1TEOS : 200H<sub>2</sub>O : (0~0.5)C<sub>6</sub>H<sub>6</sub>O<sub>2</sub>. The seeded growth was carried out at 165 °C for 4 h. After synthesis, the film was rinsed with deionized water and dried at 60 °C.

**Characterization:** The top and cross-sectional images of the zeolite films were obtained with scanning electron microscope SU-8010 (Hitachi) and JSM-6701F (JEOL). To observe the cross-sectional morphology, the edges of stainless steel supported MFI zeolite films were immersed into diluted HF aqueous solution for a few seconds. Then the sample were washed with deionized water, and dried at 60 °C. X-ray diffraction (XRD) patterns were collected on a Bruker D8 Advance diffractometer using Cu  $K\alpha$  radiation.  $^{29}\text{Si}$ -NMR spectra of the mother solutions for MFI film synthesis were recorded on a Bruker Avance III HD 500 spectrometer operating at a resonance frequency of 99.292 MHz.

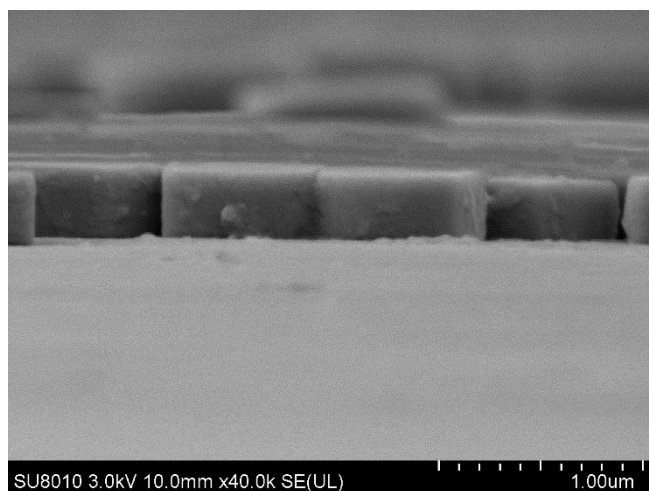

Figure S1 Cross-sectional SEM image of zeolite MFI seed layer.

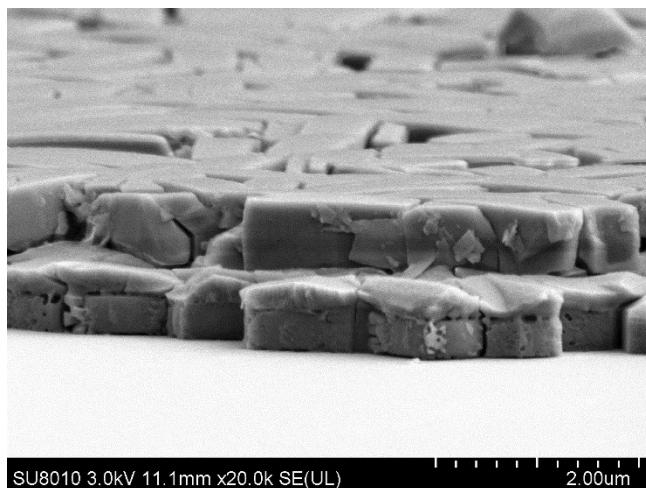

Figure S2 Cross-sectional SEM images of MFI films synthesized at 165 °C for 4 h. Synthesis solution composition: 0.2TPAOH : 1TEOS : 200H<sub>2</sub>O.

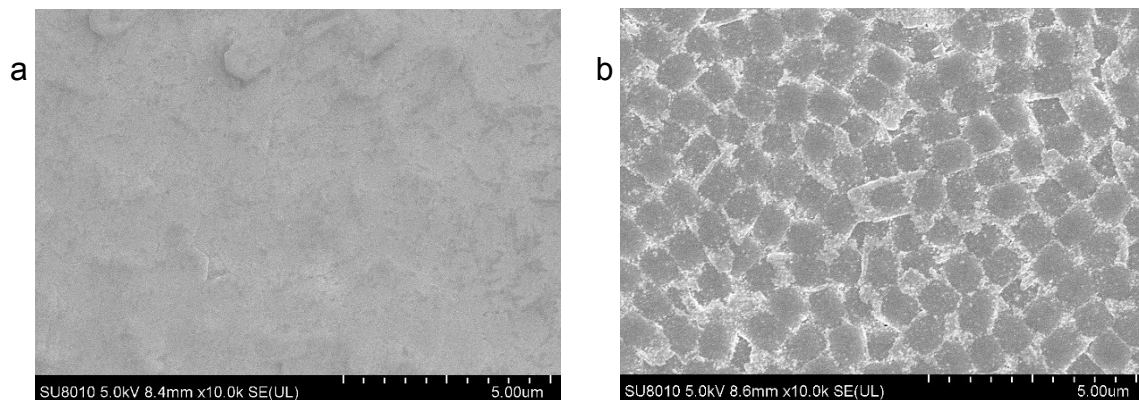

Figure S3 SEM images of MFI films synthesized at 165 °C for 4 h. Synthesis solution composition: 0.2TPAOH : 1TEOS : 200H<sub>2</sub>O :  $x$ C<sub>6</sub>H<sub>6</sub>O<sub>2</sub>, (a)  $x = 0.4$ , (b)  $x = 0.5$ .

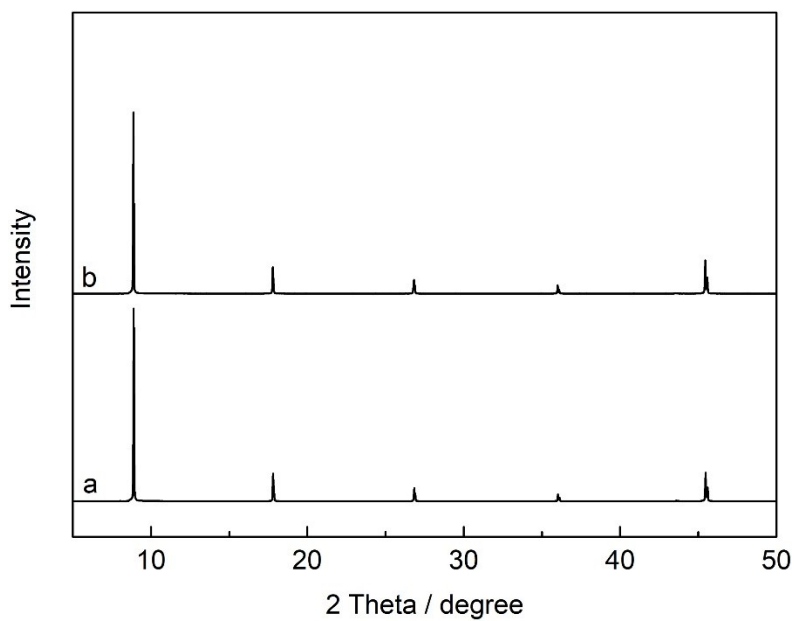

Figure S4 XRD patterns of MFI films synthesized at 165 °C for 4 h. Synthesis solution composition: 0.2TPAOH : 1TEOS : 200H<sub>2</sub>O :  $x$ C<sub>6</sub>H<sub>6</sub>O<sub>2</sub>, (a)  $x = 0.4$ , (b)  $x = 0.5$ .
